# Supplementary material
Source: PubMed Central journal article supplement (PMC4717479)
Supplement: NIHMS746364-supplement-02.pdf [file NIHMS746364-supplement-02.pdf]

**Supplementary Table 1 - Candidate SNPs genotyped in EA patients  
with NE in E1199**

| SNP        | SNP call rate | P_HWE       | MAF  | Effect_Allele |
|------------|---------------|-------------|------|---------------|
| rs351676   | 17.1%         | 0.960082334 | 0.11 | G             |
| rs2280063  | 90.4%         | 0.40702994  | 0.25 | G             |
| rs10198990 | 91.7%         | 0.555005048 | 0.35 | T             |
| rs7632357  | 92.0%         | 0.316505733 | 0.42 | T             |
| rs1867302  | 92.1%         | 0.801855239 | 0.29 | T             |
| rs6779690  | 92.1%         | 0.105625195 | 0.17 | T             |
| rs7898877  | 93.1%         | 0.086427176 | 0.30 | T             |
| rs1043420  | 93.2%         | 0.508643891 | 0.23 | G             |
| rs12438913 | 93.2%         | 0.873339393 | 0.08 | T             |
| rs1246172  | 93.5%         | 0.204926335 | 0.29 | G             |
| rs12928806 | 93.9%         | 0.206390323 | 0.10 | G             |
| rs1878069  | 94.2%         | 0.479798653 | 0.39 | G             |
| rs10516190 | 94.3%         | 0.749615042 | 0.12 | T             |
| rs3012437  | 94.5%         | 3.19923E-10 | 0.42 | T             |
| rs1075493  | 94.6%         | 0.957130745 | 0.24 | T             |
| rs10971720 | 94.6%         | 0.762963966 | 0.25 | G             |
| rs2298627  | 94.7%         | 0.592129984 | 0.05 | T             |
| rs1347047  | 94.8%         | 0.69895153  | 0.41 | T             |
| rs6970118  | 94.9%         | 0.836733489 | 0.08 | G             |
| rs10219188 | 95.2%         | 0.119948799 | 0.46 | T             |
| rs12540272 | 95.2%         | 0.602282967 | 0.17 | G             |
| rs514346   | 95.5%         | 0.681764071 | 0.09 | G             |
| rs6939222  | 95.5%         | 0.679733546 | 0.04 | T             |
| rs10024612 | 95.5%         | 0.010692531 | 0.38 | T             |
| rs2062640  | 95.6%         | 0.046748063 | 0.11 | G             |
| rs10914565 | 95.6%         | 0.888496504 | 0.04 | T             |
| rs902964   | 95.7%         | 0.773895863 | 0.06 | G             |
| rs2228367  | 95.7%         | 0.418432895 | 0.02 | T             |
| rs7440590  | 95.8%         | 0.64440453  | 0.47 | T             |
| rs1882115  | 95.9%         | 0.43220972  | 0.19 | C             |
| rs2276496  | 95.9%         | 0.712909129 | 0.17 | T             |
| rs6056558  | 95.9%         | 0           | 0.38 | T             |
| rs6875477  | 95.9%         | 0.216699106 | 0.48 | G             |
| rs7279115  | 96.2%         | 0.974340017 | 0.35 | C             |
| rs2673748  | 96.3%         | 0.514668106 | 0.42 | G             |
| rs7635760  | 96.3%         | 0.443885297 | 0.27 | C             |
| rs11810754 | 96.5%         | 0.132229837 | 0.42 | T             |
| rs9927359  | 96.6%         | 0.898655711 | 0.41 | G             |
| rs10440830 | 96.6%         | 0.221032767 | 0.37 | T             |
| rs11706033 | 96.9%         | 0.034750622 | 0.16 | T             |
| rs3125923  | 97.2%         | 0.88590769  | 0.15 | G             |
| rs4233429  | 97.2%         | 0.056706269 | 0.26 | T             |
| rs8035499  | 97.3%         | 0.479095225 | 0.08 | T             |

|            |        |             |      |   |
|------------|--------|-------------|------|---|
| rs12370102 | 97.3%  | 0.08864046  | 0.08 | T |
| rs10973024 | 97.7%  | 0.702184352 | 0.14 | T |
| rs843399   | 97.9%  | 0.020333814 | 0.31 | G |
| rs1163297  | 98.1%  | 0.360340315 | 0.43 | C |
| rs9862208  | 98.1%  | 0.929258347 | 0.10 | A |
| rs17509429 | 98.1%  | 0.007837423 | 0.11 | T |
| rs6888013  | 98.4%  | 0.129580821 | 0.14 | T |
| rs16872695 | 100.0% | 0.390868905 | 0.04 | T |

---

**EA** European descent  
**NE** Neuropathy  
**SNP** Single Nucleotide Polymorphism  
**HWE** Hardy Weinberg Equilibrium  
**MAF** Minor Allele Frequency in tested population

**Supplementary Table 2 - Summary of SNPs with p<0.0001 in EA patients  
with Grade3-4 NE in E5103**

| SNP        | CHR | BP        | OR   | P        | Effect_Allele | MAF  | Gene           |
|------------|-----|-----------|------|----------|---------------|------|----------------|
| rs10405376 | 19  | 9276166   | 2.07 | 1.94E-08 | T             | 0.03 |                |
| rs2228367  | 19  | 16197320  | 1.83 | 7.83E-07 | C             | 0.03 | <i>TPM4</i>    |
| rs12438913 | 15  | 36318243  | 2.26 | 8.92E-07 | T             | 0.09 |                |
| rs2136594  | 10  | 87242681  | 1.96 | 1.02E-06 | G             | 0.30 |                |
| rs9806757  | 15  | 36312457  | 2.25 | 1.25E-06 | A             | 0.09 |                |
| rs7898877  | 10  | 87236564  | 0.51 | 1.33E-06 | T             | 0.30 |                |
| rs16962252 | 15  | 36290481  | 2.23 | 1.38E-06 | T             | 0.09 |                |
| rs7903512  | 10  | 87251813  | 0.52 | 1.39E-06 | G             | 0.30 |                |
| rs10520043 | 15  | 36312948  | 2.23 | 1.67E-06 | A             | 0.09 |                |
| rs11813392 | 10  | 87232638  | 0.52 | 1.78E-06 | G             | 0.30 |                |
| rs1878069  | 21  | 43974569  | 0.57 | 1.96E-06 | A             | 0.38 | <i>SLC37A1</i> |
| rs6875477  | 5   | 2533617   | 1.67 | 2.01E-06 | G             | 0.49 |                |
| rs16962261 | 15  | 36293228  | 2.20 | 2.63E-06 | G             | 0.09 |                |
| rs1510390  | 15  | 36304188  | 2.14 | 3.33E-06 | C             | 0.10 |                |
| rs16962240 | 15  | 36287828  | 2.13 | 5.37E-06 | T             | 0.10 |                |
| rs10198990 | 2   | 64299693  | 1.67 | 5.64E-06 | C             | 0.36 |                |
| rs6970118  | 7   | 93513413  | 2.23 | 5.67E-06 | G             | 0.09 |                |
| rs10198613 | 2   | 64299270  | 0.60 | 6.34E-06 | T             | 0.36 |                |
| rs514346   | 16  | 5466095   | 1.99 | 6.92E-06 | G             | 0.11 |                |
| rs2062640  | 15  | 55029974  | 2.01 | 7.93E-06 | G             | 0.12 |                |
| rs10243038 | 7   | 93455006  | 2.17 | 9.15E-06 | C             | 0.10 |                |
| rs2651747  | 15  | 55065902  | 0.47 | 9.84E-06 | T             | 0.09 |                |
| rs12928806 | 16  | 56050321  | 0.42 | 1.06E-05 | G             | 0.06 |                |
| rs2695674  | 15  | 55079567  | 0.47 | 1.09E-05 | T             | 0.09 |                |
| rs11810754 | 1   | 53067914  | 1.69 | 1.25E-05 | T             | 0.38 |                |
| rs7280392  | 21  | 43988437  | 0.61 | 1.43E-05 | A             | 0.39 | <i>SLC37A1</i> |
| rs1867302  | 3   | 64391051  | 0.58 | 1.59E-05 | G             | 0.29 |                |
| rs10234713 | 7   | 93520071  | 2.23 | 1.61E-05 | G             | 0.08 |                |
| rs7635760  | 3   | 116398764 | 0.52 | 1.65E-05 | C             | 0.26 |                |
| rs6888013  | 5   | 74281643  | 1.87 | 1.77E-05 | T             | 0.15 |                |
| rs902964   | 9   | 72597565  | 2.06 | 1.90E-05 | G             | 0.07 |                |
| rs9927359  | 16  | 54549638  | 1.56 | 1.91E-05 | G             | 0.39 |                |
| rs6779690  | 3   | 24267011  | 0.53 | 2.00E-05 | T             | 0.14 | <i>THRB</i>    |
| rs843399   | 2   | 116185335 | 0.60 | 2.21E-05 | G             | 0.30 | <i>DPP10</i>   |
| rs4233429  | 1   | 91099903  | 1.61 | 2.26E-05 | T             | 0.27 |                |
| rs10914565 | 1   | 32958395  | 0.37 | 2.27E-05 | T             | 0.04 |                |
| rs1163009  | 12  | 81057383  | 0.59 | 2.27E-05 | A             | 0.42 | <i>PTPRQ</i>   |
| rs10060240 | 5   | 74254502  | 1.92 | 2.30E-05 | C             | 0.11 |                |
| rs12116789 | 1   | 91096973  | 0.63 | 2.45E-05 | G             | 0.29 |                |
| rs10440830 | 6   | 14027101  | 0.61 | 2.46E-05 | T             | 0.38 |                |
| rs2839557  | 21  | 43990798  | 0.62 | 2.51E-05 | A             | 0.39 | <i>SLC37A1</i> |
| rs10219188 | 11  | 21522529  | 0.64 | 2.52E-05 | T             | 0.48 | <i>NELL1</i>   |
| rs2975926  | 9   | 72648997  | 2.12 | 2.60E-05 | C             | 0.07 |                |

|            |    |           |      |          |   |      |                        |
|------------|----|-----------|------|----------|---|------|------------------------|
| rs10024612 | 4  | 11850963  | 1.63 | 2.67E-05 | T | 0.40 |                        |
| rs8058303  | 16 | 56049162  | 0.42 | 2.82E-05 | C | 0.06 |                        |
| rs16872695 | 4  | 22468388  | 2.39 | 2.89E-05 | T | 0.05 | <i>GPR125</i>          |
| rs1153046  | 12 | 81073903  | 0.60 | 2.96E-05 | T | 0.42 | <i>PTPRQ</i>           |
| rs13236645 | 7  | 22806718  | 1.66 | 3.01E-05 | G | 0.28 |                        |
| rs16872651 | 4  | 22439599  | 1.84 | 3.08E-05 | A | 0.12 | <i>GPR125</i>          |
| rs417252   | 21 | 44004253  | 0.62 | 3.12E-05 | C | 0.39 |                        |
| rs1163297  | 12 | 81067338  | 1.67 | 3.15E-05 | C | 0.42 | <i>PTPRQ</i>           |
| rs4776247  | 15 | 55022157  | 0.50 | 3.22E-05 | G | 0.10 |                        |
| rs12370102 | 12 | 130237574 | 0.49 | 3.25E-05 | T | 0.11 | <i>TMEM132D</i>        |
| rs4970524  | 1  | 32942662  | 2.66 | 3.37E-05 | C | 0.05 | <i>ZBTB8B</i>          |
| rs16962350 | 15 | 36320372  | 1.89 | 3.45E-05 | A | 0.14 |                        |
| rs10862181 | 12 | 81060221  | 0.60 | 3.73E-05 | T | 0.42 | <i>PTPRQ</i>           |
| rs10973024 | 9  | 3677809   | 1.87 | 3.80E-05 | T | 0.13 |                        |
| rs1244370  | 14 | 34694960  | 1.77 | 3.94E-05 | A | 0.16 |                        |
| rs1882115  | 12 | 114702099 | 0.50 | 4.03E-05 | C | 0.19 |                        |
| rs17650038 | 10 | 119727648 | 1.86 | 4.22E-05 | A | 0.12 |                        |
| rs13336016 | 16 | 56049756  | 2.85 | 4.56E-05 | A | 0.04 |                        |
| rs3125923  | 1  | 68858479  | 1.80 | 4.99E-05 | G | 0.16 |                        |
| rs7279115  | 21 | 42283732  | 1.59 | 5.06E-05 | C | 0.37 |                        |
| rs1264077  | 14 | 34697065  | 1.68 | 5.19E-05 | G | 0.22 |                        |
| rs329495   | 2  | 64300944  | 1.54 | 5.49E-05 | G | 0.50 |                        |
| rs17618270 | 10 | 119873857 | 1.83 | 5.60E-05 | G | 0.12 | <i>CASC2</i>           |
| rs389157   | 21 | 44001199  | 1.58 | 5.60E-05 | T | 0.39 | <i>SLC37A1</i>         |
| rs2280063  | 3  | 168645151 | 1.59 | 5.63E-05 | A | 0.27 |                        |
| rs7240069  | 18 | 7685332   | 1.86 | 5.78E-05 | C | 0.10 | <i>PTPRM</i>           |
| rs11706033 | 3  | 71987961  | 1.76 | 5.80E-05 | T | 0.18 |                        |
| rs12540272 | 7  | 43254706  | 0.48 | 5.88E-05 | G | 0.18 | <i>HECW1</i>           |
| rs412137   | 5  | 2465418   | 1.57 | 6.05E-05 | G | 0.38 |                        |
| rs9690859  | 7  | 138770415 | 1.66 | 6.07E-05 | T | 0.20 | <i>ZC3HAV1</i>         |
| rs12535022 | 7  | 138771905 | 1.66 | 6.07E-05 | T | 0.20 | <i>ZC3HAV1</i>         |
| rs3012437  | 6  | 170572741 | 0.63 | 6.29E-05 | C | 0.43 |                        |
| rs16837714 | 4  | 5831665   | 2.39 | 6.36E-05 | T | 0.05 | <i>CRMP1</i>           |
| rs6939222  | 6  | 51793628  | 2.44 | 6.43E-05 | T | 0.04 | <i>PKHD1</i>           |
| rs17099088 | 14 | 100286536 | 0.41 | 6.46E-05 | T | 0.04 | <i>EML1</i>            |
| rs351676   | 2  | 143711265 | 0.42 | 6.52E-05 | A | 0.11 | <i>KYNU</i>            |
| rs351685   | 2  | 143720342 | 0.42 | 6.52E-05 | C | 0.11 | <i>KYNU</i>            |
| rs4876289  | 8  | 113647451 | 2.11 | 6.66E-05 | A | 0.09 | <i>CSMD3</i>           |
| rs12140988 | 1  | 32960336  | 2.51 | 6.69E-05 | G | 0.05 |                        |
| rs16872711 | 4  | 22469890  | 2.31 | 6.76E-05 | C | 0.05 | <i>GPR125</i>          |
| rs7632357  | 3  | 32992203  | 0.62 | 6.95E-05 | T | 0.41 |                        |
| rs7041888  | 9  | 3676890   | 1.83 | 6.96E-05 | T | 0.13 |                        |
| rs7168471  | 15 | 36323763  | 1.85 | 7.12E-05 | G | 0.14 |                        |
| rs11919443 | 3  | 196048895 | 1.69 | 7.25E-05 | A | 0.21 | <i>M4SF19-TCTEX1D;</i> |
| rs7040514  | 9  | 3676560   | 1.82 | 7.48E-05 | A | 0.12 |                        |
| rs1276116  | 14 | 70394903  | 1.72 | 7.64E-05 | G | 0.33 | <i>SMOC1</i>           |
| kgp581920  | 19 | 56206311  | 2.44 | 7.77E-05 | T | 0.03 | <i>EPN1</i>            |

|            |    |           |      |          |   |      |                |
|------------|----|-----------|------|----------|---|------|----------------|
| rs10153233 | 16 | 56039886  | 0.45 | 7.83E-05 | A | 0.06 |                |
| rs7428479  | 3  | 32985486  | 1.61 | 7.85E-05 | C | 0.41 |                |
| rs2531155  | 4  | 16018142  | 0.62 | 8.11E-05 | T | 0.30 | <i>PROM1</i>   |
| rs7356745  | 5  | 74243120  | 1.85 | 8.16E-05 | C | 0.11 |                |
| rs11769769 | 7  | 128312450 | 1.57 | 8.25E-05 | T | 0.38 | <i>FAM71F2</i> |
| rs7440590  | 4  | 90028412  | 0.64 | 8.28E-05 | T | 0.46 |                |
| rs7612287  | 3  | 32990101  | 1.60 | 8.36E-05 | T | 0.41 |                |
| rs9862208  | 3  | 194244722 | 2.00 | 8.46E-05 | A | 0.09 |                |
| rs2727529  | 7  | 151356274 | 1.54 | 8.55E-05 | T | 0.44 | <i>PRKAG2</i>  |
| rs1246172  | 6  | 156954218 | 0.65 | 8.61E-05 | G | 0.27 |                |
| rs835278   | 10 | 94809799  | 0.65 | 8.63E-05 | T | 0.45 | <i>EXOC6</i>   |
| rs10971720 | 9  | 33827153  | 0.62 | 8.73E-05 | G | 0.22 | <i>UBE2R2</i>  |
| rs2276496  | 20 | 52611188  | 0.56 | 8.83E-05 | T | 0.18 | <i>BCAS1</i>   |
| rs6093938  | 20 | 42759565  | 0.55 | 8.87E-05 | C | 0.29 | <i>JPH2</i>    |
| rs2039470  | 9  | 3684635   | 1.84 | 8.90E-05 | A | 0.14 |                |
| rs2298627  | 18 | 47455783  | 2.67 | 9.01E-05 | C | 0.04 | <i>MYO5B</i>   |
| rs2673748  | 5  | 127069127 | 1.54 | 9.04E-05 | G | 0.42 |                |
| rs1075493  | 8  | 140917457 | 0.56 | 9.06E-05 | C | 0.27 | <i>TRAPPC9</i> |
| rs1347047  | 4  | 70521755  | 0.64 | 9.32E-05 | C | 0.44 |                |
| rs2013836  | 1  | 181142796 | 2.63 | 9.33E-05 | A | 0.04 |                |
| rs8035499  | 15 | 73428224  | 0.53 | 9.48E-05 | T | 0.07 | <i>NEO1</i>    |
| rs13146788 | 4  | 11855572  | 1.58 | 9.57E-05 | G | 0.40 |                |
| rs17509429 | 6  | 20368246  | 0.51 | 9.60E-05 | T | 0.10 |                |
| rs10516190 | 4  | 6755936   | 0.43 | 9.75E-05 | T | 0.13 |                |
| rs1043420  | 11 | 76836439  | 0.55 | 9.90E-05 | G | 0.24 | <i>CAPN5</i>   |
| rs12102682 | 16 | 84391427  | 1.63 | 9.90E-05 | G | 0.18 |                |
| rs2681962  | 15 | 54898587  | 0.53 | 9.92E-05 | G | 0.13 | <i>UNC13C</i>  |
| rs3210458  | 3  | 141011630 | 0.37 | 9.94E-05 | T | 0.09 | <i>ACPL2</i>   |
| rs11844991 | 14 | 100243690 | 2.35 | 9.96E-05 | C | 0.05 |                |
| rs6056558  | 20 | 985530    | 1.57 | 9.96E-05 | C | 0.50 |                |

|             |                                             |
|-------------|---------------------------------------------|
| <b>EA</b>   | European descent                            |
| <b>NE</b>   | Neuropathy                                  |
| <b>SNP</b>  | Single Nucleotide Polymorphism              |
| <b>CHR</b>  | Chromosome                                  |
| <b>BP</b>   | Chromosome location in base pairs           |
| <b>OR</b>   | Odds ratio from the regression              |
| <b>P</b>    | P value from the regression                 |
| <b>MAF</b>  | Minor Allele Frequency in tested population |
| <b>Gene</b> | Symbol of the gene where the SNP locates    |

**Supplementary Table 3 - Summary of SNPs with p<0.0001 in EA patients  
with Grade 2-4 NE in E5103**

| SNP        | CHR | BP        | OR   | P        | Effect_Allele | MAF  | LD support | Gene             |
|------------|-----|-----------|------|----------|---------------|------|------------|------------------|
| rs7115102  | 11  | 123014336 | 0.60 | 1.45E-06 | T             | 0.16 | N          | <i>CLMP</i>      |
| rs4638694  | 18  | 56681035  | 0.71 | 6.60E-06 | A             | 0.49 | Y          |                  |
| rs32119    | 5   | 11313143  | 1.99 | 9.27E-06 | T             | 0.06 | N          | <i>CTNND2</i>    |
| rs4940787  | 18  | 56683202  | 0.72 | 9.43E-06 | C             | 0.49 | Y          |                  |
| rs9963384  | 18  | 56685232  | 0.72 | 9.43E-06 | C             | 0.49 | Y          |                  |
| rs16860075 | 3   | 112530890 | 0.54 | 1.50E-05 | T             | 0.10 | N          |                  |
| rs9926794  | 16  | 57542539  | 0.71 | 1.97E-05 | C             | 0.33 | Y          |                  |
| rs3747309  | 23  | 153072107 | 0.67 | 2.02E-05 | C             | 0.26 | Y          |                  |
| rs9979491  | 21  | 45856615  | 0.64 | 2.09E-05 | T             | 0.19 | N          | <i>TRPM2</i>     |
| rs13334329 | 16  | 57538340  | 0.65 | 2.42E-05 | C             | 0.21 | Y          |                  |
| rs6875477  | 5   | 2533617   | 1.36 | 2.57E-05 | G             | 0.50 | N          |                  |
| rs7456697  | 7   | 76309668  | 1.43 | 2.93E-05 | C             | 0.26 | N          |                  |
| rs10016927 | 4   | 96565112  | 1.37 | 2.97E-05 | T             | 0.44 | N          |                  |
| rs696447   | 12  | 77978850  | 1.39 | 3.26E-05 | G             | 0.37 | Y          |                  |
| rs11810754 | 1   | 53067914  | 1.41 | 3.35E-05 | T             | 0.39 | N          |                  |
| rs606854   | 5   | 134572229 | 0.71 | 3.37E-05 | G             | 0.35 | Y          | <i>LOC340073</i> |
| rs1878069  | 21  | 43974569  | 0.71 | 3.51E-05 | A             | 0.39 | Y          | <i>SLC37A1</i>   |
| rs7041128  | 9   | 28420020  | 0.76 | 3.92E-05 | G             | 0.48 | N          | <i>LINGO2</i>    |
| rs2241009  | 17  | 37071189  | 0.72 | 3.93E-05 | T             | 0.33 | Y          | <i>LASP1</i>     |
| rs7280392  | 21  | 43988437  | 0.73 | 3.97E-05 | A             | 0.40 | Y          | <i>SLC37A1</i>   |
| rs523120   | 17  | 37070994  | 0.72 | 4.18E-05 | G             | 0.33 | Y          | <i>LASP1</i>     |
| rs711101   | 12  | 77982647  | 1.38 | 4.33E-05 | T             | 0.38 | Y          |                  |
| rs525989   | 17  | 37070658  | 1.38 | 4.74E-05 | T             | 0.33 | Y          | <i>LASP1</i>     |
| rs347993   | 5   | 166066255 | 1.45 | 4.75E-05 | G             | 0.25 | N          |                  |
| rs17332568 | 23  | 153067110 | 0.70 | 4.80E-05 | A             | 0.25 | Y          |                  |
| rs12539223 | 7   | 16738006  | 1.44 | 4.87E-05 | C             | 0.32 | N          | <i>BZW2</i>      |
| rs1025444  | 7   | 7178545   | 1.65 | 5.11E-05 | A             | 0.09 | N          |                  |
| rs10821312 | 9   | 96944581  | 0.68 | 5.11E-05 | G             | 0.17 | Y          |                  |
| rs17509429 | 6   | 20368246  | 0.61 | 5.38E-05 | T             | 0.11 | N          |                  |
| rs696439   | 12  | 77972858  | 1.38 | 5.42E-05 | G             | 0.37 | Y          |                  |
| rs17809374 | 11  | 84622908  | 0.46 | 5.55E-05 | G             | 0.05 | N          | <i>DLG2</i>      |
| rs606995   | 5   | 134572661 | 0.71 | 5.63E-05 | C             | 0.28 | Y          | <i>LOC340073</i> |
| rs9686502  | 5   | 76623421  | 0.72 | 5.90E-05 | G             | 0.47 | N          | <i>PDE8B</i>     |
| rs6793484  | 3   | 183197823 | 0.70 | 6.10E-05 | G             | 0.17 | N          |                  |
| rs9856864  | 3   | 69762267  | 1.45 | 6.25E-05 | G             | 0.23 | N          |                  |
| rs10271444 | 7   | 137689901 | 0.48 | 6.39E-05 | A             | 0.05 | Y          |                  |
| rs12116789 | 1   | 91096973  | 0.74 | 6.84E-05 | G             | 0.30 | N          |                  |
| rs2941346  | 16  | 9259690   | 1.73 | 6.91E-05 | G             | 0.09 | Y          |                  |
| rs10485346 | 6   | 33866059  | 0.76 | 6.95E-05 | A             | 0.49 | N          |                  |
| rs6911012  | 6   | 147020609 | 1.33 | 6.99E-05 | T             | 0.38 | N          | <i>C6orf103</i>  |
| rs1114620  | 16  | 9263737   | 1.75 | 6.99E-05 | T             | 0.09 | Y          |                  |

|            |    |           |      |          |   |      |   |                 |
|------------|----|-----------|------|----------|---|------|---|-----------------|
| rs11633198 | 15 | 98919232  | 1.51 | 7.01E-05 | C | 0.16 | N |                 |
| rs7038156  | 9  | 96959415  | 0.69 | 7.02E-05 | G | 0.18 | Y |                 |
| rs11971315 | 7  | 137703336 | 2.09 | 7.38E-05 | G | 0.05 | Y |                 |
| rs2839557  | 21 | 43990798  | 0.73 | 7.62E-05 | A | 0.40 | Y | <i>SLC37A1</i>  |
| rs615849   | 9  | 27606780  | 0.74 | 7.77E-05 | C | 0.48 | N |                 |
| rs6779690  | 3  | 24267011  | 0.64 | 7.80E-05 | T | 0.15 | N | <i>THRB</i>     |
| rs7233915  | 18 | 56684795  | 0.74 | 7.84E-05 | C | 0.42 | Y |                 |
| rs10880279 | 12 | 42664105  | 1.36 | 7.88E-05 | T | 0.37 | Y |                 |
| rs742920   | 20 | 11017796  | 1.33 | 8.43E-05 | G | 0.42 | N |                 |
| rs4662491  | 2  | 143110338 | 0.72 | 8.53E-05 | C | 0.31 | N |                 |
| rs10880282 | 12 | 42703893  | 1.35 | 8.67E-05 | G | 0.38 | Y |                 |
| rs6056558  | 20 | 985530    | 1.37 | 9.07E-05 | C | 0.49 | N |                 |
| rs12578312 | 12 | 42736267  | 0.75 | 9.16E-05 | G | 0.39 | Y | <i>PPHLN1</i>   |
| rs17465450 | 10 | 78187872  | 1.77 | 9.24E-05 | C | 0.06 | N | <i>C10orf11</i> |
| rs9973944  | 2  | 226244129 | 0.73 | 9.36E-05 | C | 0.40 | N |                 |
| rs417252   | 21 | 44004253  | 0.74 | 9.41E-05 | C | 0.40 | Y |                 |
| rs4970777  | 1  | 110283785 | 1.40 | 9.53E-05 | T | 0.44 | N |                 |
| rs2323183  | 17 | 14307405  | 0.54 | 9.58E-05 | A | 0.08 | N |                 |
| rs700975   | 9  | 98497814  | 1.36 | 9.64E-05 | G | 0.47 | N |                 |
| rs1040214  | 12 | 76593029  | 0.71 | 9.70E-05 | A | 0.26 | N |                 |
| rs2497139  | 6  | 84790544  | 0.49 | 9.86E-05 | T | 0.06 | N | <i>MRAP2</i>    |
| rs2282037  | 14 | 103588515 | 1.35 | 9.87E-05 | T | 0.49 | N |                 |
| rs31465    | 5  | 92849721  | 0.75 | 9.92E-05 | G | 0.46 | N | <i>FLJ42709</i> |
| rs7652050  | 3  | 31319355  | 0.65 | 9.94E-05 | C | 0.15 | N |                 |

|             |                                             |
|-------------|---------------------------------------------|
| <b>EA</b>   | European descent                            |
| <b>NE</b>   | Neuropathy                                  |
| <b>SNP</b>  | Single Nucleotide Polymorphism              |
| <b>CHR</b>  | Chromosome                                  |
| <b>BP</b>   | Chromosome location in base pairs           |
| <b>OR</b>   | Odds ratio from the regression              |
| <b>P</b>    | P value from the regression                 |
| <b>MAF</b>  | Minor Allele Frequency in tested population |
| <b>LD</b>   | Linkage Disequilibrium                      |
| <b>Gene</b> | Symbol of the gene where the SNP locates    |

**Supplementary Table 4 - Summary of evaluated candidate SNPs in patients with NE in E1199 or E5103**

|                   | <u>E1199 EA patients</u> |        |          |        | <u>E1199 AA patients</u> |        | <u>E5103 EA patients</u> |       |          |          | <u>E5103 AA patients</u> |          | E5103<br>MAF | Effect<br>Allele |
|-------------------|--------------------------|--------|----------|--------|--------------------------|--------|--------------------------|-------|----------|----------|--------------------------|----------|--------------|------------------|
|                   | Grade2-4                 |        | Grade3-4 |        | Grade2-4                 |        | Grade2-4                 |       | Grade3-4 |          | Grade2-4                 |          |              |                  |
|                   | OR                       | P      | OR       | P      | OR                       | P      | OR                       | P     | OR       | P        | OR                       | P        |              |                  |
| <b>rs3125923</b>  | 1.59                     | 0.0013 | 1.88     | 0.0017 | 1.24                     | 0.5305 | 1.48                     | 1E-04 | 1.80     | 4.99E-05 | 1.09                     | 0.7552   | 0.16         | G                |
| <b>rs9862208</b>  | 1.53                     | 0.0174 | 1.88     | 0.0059 | 0.25                     | 0.0222 | 1.64                     | 2E-04 | 2.00     | 8.46E-05 | 0.71                     | 0.77732  | 0.09         | A                |
| <b>rs17509429</b> | 0.76                     | 0.0936 | 0.65     | 0.0359 | 0.21                     | 0.1578 | 0.61                     | 5E-05 | 0.51     | 0.000096 | NA                       | NA       | 0.10         | T                |
| <b>rs843399</b>   | 1.33                     | 0.0101 | 1.29     | 0.1025 | 0.93                     | 0.8185 | 0.79                     | 0.005 | 0.60     | 2.21E-05 | 1.02                     | 0.91701  | 0.30         | G                |
| <b>rs1163297</b>  | 1.13                     | 0.2561 | 1.27     | 0.1207 | 0.58                     | 0.1612 | 1.26                     | 0.003 | 1.67     | 3.15E-05 | 1.20                     | 0.08502  | 0.42         | C                |
| <b>rs11810754</b> | 1.12                     | 0.2864 | 1.25     | 0.1522 | 1.00                     | 0.9994 | 1.41                     | 3E-05 | 1.69     | 1.25E-05 | 0.99                     | 0.8807   | 0.38         | T                |
| <b>rs11706033</b> | 1.19                     | 0.2119 | 1.30     | 0.2011 | 0.98                     | 0.9516 | 1.29                     | 0.017 | 1.76     | 0.000058 | 0.93                     | 0.65684  | 0.18         | T                |
| <b>rs12370102</b> | 0.83                     | 0.3184 | 0.78     | 0.3219 | 0.65                     | 0.5661 | 0.69                     | 0.006 | 0.49     | 3.25E-05 | 0.80                     | 0.59166  | 0.11         | T                |
| <b>rs12540272</b> | 1.10                     | 0.5077 | 1.17     | 0.3967 | 0.90                     | 0.8150 | 0.70                     | 7E-04 | 0.48     | 5.88E-05 | 0.83                     | 0.59441  | 0.18         | G                |
| <b>rs10024612</b> | 1.00                     | 0.9751 | 1.14     | 0.4161 | 0.83                     | 0.5901 | 1.21                     | 0.014 | 1.63     | 2.67E-05 | 1.09                     | 0.91252  | 0.40         | T                |
| <b>rs2276496</b>  | 0.93                     | 0.6172 | 1.13     | 0.5422 | 1.54                     | 0.2626 | 0.72                     | 0.001 | 0.56     | 8.83E-05 | 0.54                     | 0.029474 | 0.18         | T                |
| <b>rs2062640</b>  | 1.07                     | 0.7016 | 1.15     | 0.5517 | 1.77                     | 0.2118 | 1.40                     | 0.005 | 2.01     | 7.93E-06 | 1.40                     | 0.30352  | 0.12         | G                |
| <b>rs902964</b>   | 1.17                     | 0.4713 | 1.17     | 0.5920 | 1.21                     | 0.5748 | 1.33                     | 0.03  | 2.06     | 0.000019 | 0.62                     | 0.05905  | 0.07         | G                |
| <b>rs10219188</b> | 0.98                     | 0.8463 | 1.08     | 0.6088 | 0.72                     | 0.3467 | 0.83                     | 0.004 | 0.64     | 2.52E-05 | 1.18                     | 0.97141  | 0.48         | T                |
| <b>rs10440830</b> | 1.05                     | 0.6680 | 1.07     | 0.6722 | 0.86                     | 0.6981 | 0.78                     | 6E-04 | 0.61     | 2.46E-05 | 0.94                     | 0.86614  | 0.38         | T                |
| <b>rs10973024</b> | 0.96                     | 0.7824 | 1.09     | 0.6783 | 1.64                     | 0.2755 | 1.38                     | 0.004 | 1.87     | 0.000038 | 0.90                     | 0.76439  | 0.13         | T                |
| <b>rs7440590</b>  | 1.20                     | 0.0862 | 0.94     | 0.6784 | 1.50                     | 0.2283 | 0.79                     | 0.003 | 0.64     | 8.28E-05 | 0.98                     | 0.95301  | 0.46         | T                |
| <b>rs7635760</b>  | 0.95                     | 0.7126 | 0.94     | 0.7421 | 0.73                     | 0.3849 | 0.77                     | 0.007 | 0.52     | 1.65E-05 | 1.00                     | 0.67402  | 0.26         | C                |
| <b>rs9927359</b>  | 0.92                     | 0.4368 | 1.04     | 0.7750 | 0.71                     | 0.3400 | 1.17                     | 0.029 | 1.56     | 1.91E-05 | 0.96                     | 0.48342  | 0.39         | G                |
| <b>rs6939222</b>  | 0.87                     | 0.5877 | 1.10     | 0.7976 | 0.77                     | 0.6910 | 1.76                     | 0.001 | 2.44     | 6.43E-05 | 1.42                     | 0.76527  | 0.04         | T                |
| <b>rs8035499</b>  | 1.07                     | 0.6988 | 0.94     | 0.8022 | 1.01                     | 0.9827 | 0.75                     | 0.014 | 0.53     | 9.48E-05 | 1.58                     | 0.17254  | 0.07         | T                |
| <b>rs6888013</b>  | 1.04                     | 0.8060 | 1.05     | 0.8056 | 0.62                     | 0.3644 | 1.31                     | 0.008 | 1.87     | 1.77E-05 | 1.84                     | 0.15443  | 0.15         | T                |
| <b>rs4233429</b>  | 1.09                     | 0.4566 | 1.03     | 0.8376 | 1.09                     | 0.8515 | 1.31                     | 4E-04 | 1.61     | 2.26E-05 | 0.57                     | 0.34608  | 0.27         | T                |
| <b>rs6875477</b>  | 1.07                     | 0.5320 | 1.02     | 0.8722 | 0.74                     | 0.3604 | 1.36                     | 3E-05 | 1.67     | 2.01E-06 | 0.96                     | 0.59935  | 0.49         | G                |
| <b>rs10914565</b> | 0.74                     | 0.2546 | 1.06     | 0.8813 | 0.24                     | 0.0335 | 0.60                     | 0.009 | 0.37     | 2.27E-05 | 0.44                     | 0.042542 | 0.04         | T                |
| <b>rs7279115</b>  | 1.04                     | 0.7512 | 1.02     | 0.8925 | 0.93                     | 0.8147 | 1.27                     | 0.004 | 1.59     | 5.06E-05 | 1.03                     | 0.93405  | 0.37         | C                |
| <b>rs514346</b>   | 0.97                     | 0.8830 | 0.97     | 0.9081 | 1.34                     | 0.5735 | 1.39                     | 0.002 | 1.99     | 6.92E-06 | 0.52                     | 0.048334 | 0.11         | G                |
| <b>rs2673748</b>  | 1.05                     | 0.6497 | 1.01     | 0.9663 | 1.47                     | 0.2432 | 1.28                     | 9E-04 | 1.54     | 9.04E-05 | 0.94                     | 0.62319  | 0.42         | G                |
| <b>rs16872695</b> | 1.00                     | 0.9984 | 1.01     | 0.9670 | 1.05                     | 0.9246 | 1.47                     | 0.012 | 2.39     | 2.89E-05 | 0.99                     | 0.5532   | 0.05         | T                |
| <b>rs1882115</b>  | 0.98                     | 0.8697 | 0.99     | 0.9683 | 0.73                     | 0.4185 | 0.69                     | 2E-04 | 0.50     | 4.03E-05 | 1.05                     | 0.80465  | 0.19         | C                |

EA European descent  
AA African descent  
NE Neuropathy  
SNP Single Nucleotide Polymorphism  
OR Odds ratio from the regression  
P P value from the regression



**Supplementary Table 5 - Summary of SNPs with  $p < 0.0001$  in AA patients  
with grade 2-4 NE in E5103**

| SNP        | CHR | BP        | OR   | P        | Effect_Allele | MAF  | LD support | Gene                      |
|------------|-----|-----------|------|----------|---------------|------|------------|---------------------------|
| rs1856746  | 1   | 207143422 | 5.54 | 1.57E-07 | G             | 0.13 | Y          | <i>FCAMR</i>              |
| rs291096   | 1   | 207110936 | 5.34 | 2.00E-07 | G             | 0.13 | Y          | <i>PIGR</i>               |
| rs2791713  | 1   | 207153881 | 5.31 | 2.32E-07 | T             | 0.14 | Y          |                           |
| rs94872    | 1   | 207086845 | 5.18 | 4.91E-07 | C             | 0.12 | Y          | <i>FAIM3</i>              |
| rs7622021  | 3   | 43179422  | 3.11 | 1.22E-06 | C             | 0.34 | Y          |                           |
| rs10863614 | 1   | 221615451 | 2.83 | 1.67E-06 | A             | 0.32 | Y          |                           |
| rs997927   | 1   | 221659411 | 3.11 | 2.43E-06 | C             | 0.46 | Y          |                           |
| rs4323260  | 5   | 129364691 | 6.85 | 2.48E-06 | C             | 0.05 | N          | <i>CHSY3</i>              |
| rs422931   | 12  | 125896922 | 3.09 | 3.55E-06 | T             | 0.42 | N          | <i>TMEM132B</i>           |
| rs2372337  | 3   | 43186244  | 0.27 | 4.61E-06 | A             | 0.22 | Y          |                           |
| rs2791706  | 1   | 207163372 | 0.24 | 4.69E-06 | T             | 0.14 | Y          |                           |
| rs9855487  | 3   | 181588884 | 0.30 | 5.11E-06 | C             | 0.12 | Y          |                           |
| rs1884134  | 22  | 27831650  | 0.40 | 5.33E-06 | G             | 0.34 | N          |                           |
| rs12773938 | 10  | 91338675  | 0.31 | 5.63E-06 | G             | 0.17 | Y          |                           |
| rs2777329  | 13  | 104394327 | 0.38 | 5.96E-06 | G             | 0.36 | N          |                           |
| rs11509139 | 7   | 24781080  | 0.17 | 7.67E-06 | G             | 0.06 | N          | <i>DFNA5</i>              |
| rs11811065 | 1   | 237415237 | 3.64 | 8.16E-06 | C             | 0.06 | N          | <i>RYR2</i>               |
| rs919005   | 4   | 37769527  | 0.27 | 8.35E-06 | A             | 0.09 | N          |                           |
| rs17307813 | 11  | 25362364  | 0.27 | 8.95E-06 | G             | 0.10 | Y          |                           |
| rs10268441 | 7   | 115317894 | 0.30 | 9.56E-06 | C             | 0.15 | N          |                           |
| rs11028634 | 11  | 25377220  | 0.28 | 1.09E-05 | T             | 0.11 | Y          |                           |
| rs6974849  | 7   | 21140648  | 0.20 | 1.25E-05 | A             | 0.07 | N          |                           |
| rs1897905  | 8   | 69484133  | 0.32 | 1.38E-05 | A             | 0.15 | N          | <i>C8orf34</i>            |
| rs6723449  | 2   | 218997580 | 3.24 | 1.42E-05 | C             | 0.17 | Y          | <i>CXCR2</i>              |
| rs1863332  | 2   | 47629898  | 0.32 | 1.43E-05 | G             | 0.16 | N          |                           |
| rs6737563  | 2   | 218945674 | 4.08 | 1.67E-05 | C             | 0.12 | Y          | <i>RUFY4</i>              |
| rs11215690 | 11  | 115685475 | 2.64 | 1.80E-05 | G             | 0.46 | N          |                           |
| rs9684145  | 4   | 75152436  | 0.31 | 1.84E-05 | A             | 0.15 | N          | <i>MTHFD2L</i>            |
| rs4767920  | 12  | 121065277 | 2.93 | 2.18E-05 | A             | 0.20 | N          |                           |
| rs3848208  | 15  | 80714629  | 0.34 | 2.18E-05 | G             | 0.26 | Y          | <i>ARNT2</i>              |
| rs10098260 | 8   | 64046837  | 0.22 | 2.21E-05 | T             | 0.06 | N          |                           |
| rs10739878 | 9   | 106535762 | 6.24 | 2.31E-05 | G             | 0.06 | N          |                           |
| rs10750293 | 11  | 124910710 | 0.34 | 2.41E-05 | G             | 0.18 | Y          | <i>CCDC15</i>             |
| rs10508544 | 10  | 17766711  | 0.32 | 2.44E-05 | T             | 0.13 | Y          |                           |
| rs7060714  | 23  | 92833381  | 0.38 | 2.53E-05 | T             | 0.10 | N          |                           |
| rs9880895  | 3   | 181577965 | 0.37 | 2.60E-05 | A             | 0.16 | Y          |                           |
| rs12657678 | 5   | 49860118  | 2.42 | 2.63E-05 | A             | 0.43 | N          |                           |
| rs5993955  | 22  | 20283228  | 0.45 | 2.69E-05 | T             | 0.30 | Y          |                           |
| rs13013    | 10  | 75562161  | 2.30 | 2.88E-05 | T             | 0.38 | Y          | <i>NDST2</i>              |
| rs6694450  | 1   | 221654528 | 2.76 | 2.93E-05 | T             | 0.49 | Y          |                           |
| rs11155146 | 6   | 141267021 | 0.41 | 2.96E-05 | A             | 0.24 | Y          |                           |
| rs11254723 | 10  | 17724122  | 0.34 | 2.96E-05 | A             | 0.13 | Y          | <i>STAM</i>               |
| rs4877750  | 9   | 85872664  | 2.58 | 3.07E-05 | C             | 0.22 | N          | <i>FRMD3 LOC100506605</i> |

|            |    |           |       |          |   |      |   |              |
|------------|----|-----------|-------|----------|---|------|---|--------------|
| rs11588887 | 1  | 159717162 | 0.38  | 3.11E-05 | A | 0.13 | Y |              |
| rs6077011  | 20 | 6456282   | 0.41  | 3.12E-05 | C | 0.20 | N |              |
| rs10431813 | 15 | 80711753  | 0.35  | 3.14E-05 | A | 0.26 | Y | ARNT2        |
| rs6910259  | 6  | 14560514  | 0.37  | 3.20E-05 | G | 0.17 | N |              |
| rs6862162  | 5  | 100592006 | 3.08  | 3.43E-05 | A | 0.25 | Y |              |
| rs1871898  | 12 | 129849900 | 0.41  | 3.59E-05 | G | 0.28 | N | TMEM132D     |
| rs10881603 | 10 | 91333674  | 0.33  | 3.64E-05 | G | 0.16 | Y |              |
| rs4612816  | 11 | 124874382 | 2.59  | 3.67E-05 | A | 0.19 | Y | CCDC15       |
| rs17117138 | 5  | 154614881 | 0.35  | 3.68E-05 | A | 0.15 | N |              |
| rs332118   | 10 | 28928158  | 0.28  | 3.87E-05 | A | 0.10 | Y |              |
| rs11794979 | 9  | 12290837  | 0.20  | 3.89E-05 | T | 0.07 | N |              |
| rs11505129 | 5  | 100567453 | 2.65  | 3.90E-05 | G | 0.29 | Y |              |
| rs10045726 | 5  | 148352990 | 2.11  | 3.93E-05 | T | 0.36 | Y |              |
| rs7076585  | 10 | 75503692  | 2.27  | 3.98E-05 | C | 0.38 | Y | LOC100507280 |
| rs6788128  | 3  | 146397550 | 0.24  | 4.03E-05 | A | 0.07 | N |              |
| rs7525417  | 1  | 183211052 | 3.01  | 4.15E-05 | G | 0.12 | N | LAMC2        |
| rs332182   | 10 | 28910715  | 2.37  | 4.39E-05 | T | 0.31 | Y |              |
| rs7511723  | 1  | 244155946 | 2.70  | 4.42E-05 | C | 0.27 | N | LOC339529    |
| rs6527298  | 23 | 33807695  | 0.38  | 4.42E-05 | G | 0.21 | N |              |
| rs6914898  | 6  | 141233620 | 0.42  | 4.51E-05 | A | 0.23 | Y |              |
| rs2850981  | 4  | 102097403 | 0.30  | 4.89E-05 | T | 0.25 | N | PPP3CA       |
| rs9729189  | 1  | 221694160 | 0.35  | 4.92E-05 | G | 0.34 | Y |              |
| rs6655923  | 1  | 221627469 | 0.33  | 5.14E-05 | A | 0.21 | Y |              |
| rs9730262  | 1  | 221694627 | 2.82  | 5.16E-05 | G | 0.34 | Y |              |
| rs17104583 | 11 | 105684159 | 3.35  | 5.27E-05 | T | 0.31 | N | GRIA4        |
| rs17181170 | 3  | 87173324  | 0.35  | 5.35E-05 | A | 0.20 | Y |              |
| rs7426289  | 2  | 218966315 | 2.56  | 5.64E-05 | T | 0.23 | Y |              |
| rs5910382  | 23 | 117721437 | 0.35  | 5.72E-05 | T | 0.09 | N |              |
| rs6555750  | 5  | 166904890 | 2.55  | 5.77E-05 | G | 0.42 | N | ODZ2         |
| rs332157   | 10 | 28883068  | 2.29  | 5.85E-05 | A | 0.31 | Y | WAC          |
| rs7379603  | 5  | 3320814   | 2.58  | 5.96E-05 | T | 0.28 | N |              |
| kgp7764620 | 8  | 128499110 | 10.49 | 6.09E-05 | G | 0.08 | N |              |
| rs1929210  | 13 | 110285478 | 0.46  | 6.22E-05 | C | 0.43 | N |              |
| rs1072523  | 10 | 28819406  | 2.17  | 6.27E-05 | A | 0.35 | Y | LOC220906    |
| rs6856880  | 4  | 17419691  | 0.33  | 6.34E-05 | G | 0.15 | N |              |
| rs12407509 | 1  | 245992462 | 0.26  | 6.43E-05 | G | 0.07 | N | SMYD3        |
| rs4963212  | 11 | 32530384  | 0.40  | 6.48E-05 | T | 0.23 | N |              |
| rs10040798 | 5  | 148367324 | 2.06  | 6.74E-05 | G | 0.36 | Y | SH3TC2       |
| rs11111093 | 12 | 102327309 | 0.27  | 6.77E-05 | C | 0.08 | N |              |
| rs10798954 | 1  | 33941028  | 2.34  | 7.05E-05 | T | 0.40 | N | ZSCAN20      |
| rs505509   | 23 | 45878983  | 3.05  | 7.29E-05 | G | 0.10 | N |              |
| rs12109285 | 5  | 21749348  | 0.42  | 7.31E-05 | C | 0.24 | N |              |
| rs7079172  | 10 | 52478264  | 2.07  | 7.49E-05 | C | 0.30 | N |              |
| rs12414562 | 10 | 53385460  | 2.98  | 7.51E-05 | A | 0.20 | N | PRKG1        |
| rs10995090 | 10 | 63974229  | 0.26  | 7.51E-05 | G | 0.10 | N | RTKN2        |
| rs10240887 | 7  | 8790170   | 0.41  | 7.72E-05 | C | 0.31 | N | NXPB1        |
| rs6992430  | 8  | 102632573 | 0.39  | 7.75E-05 | G | 0.33 | N | GRHL2        |

|            |    |           |      |          |   |      |   |                |
|------------|----|-----------|------|----------|---|------|---|----------------|
| rs4568493  | 6  | 106329966 | 3.70 | 7.91E-05 | G | 0.20 | N |                |
| rs26000    | 5  | 11302022  | 0.52 | 7.94E-05 | A | 0.34 | N | <i>CTNND2</i>  |
| rs34326408 | 12 | 113647337 | 0.46 | 7.97E-05 | C | 0.31 | N | <i>IQCD</i>    |
| rs10900494 | 1  | 205438914 | 2.85 | 7.99E-05 | G | 0.37 | N |                |
| rs10214532 | 6  | 66830696  | 0.44 | 8.13E-05 | T | 0.39 | Y |                |
| rs9354379  | 6  | 66840711  | 0.44 | 8.17E-05 | T | 0.39 | Y |                |
| rs901843   | 3  | 87228584  | 0.34 | 8.26E-05 | A | 0.13 | Y |                |
| rs1469784  | 4  | 30156463  | 0.30 | 8.43E-05 | G | 0.11 | N |                |
| rs200807   | 6  | 97903674  | 2.49 | 8.55E-05 | T | 0.32 | N |                |
| rs1035239  | 22 | 20793914  | 2.49 | 8.58E-05 | C | 0.31 | N |                |
| rs11188985 | 10 | 98767842  | 0.36 | 8.63E-05 | T | 0.27 | N | <i>SLIT1</i>   |
| rs237115   | 6  | 79410392  | 0.31 | 9.02E-05 | G | 0.09 | N |                |
| rs4143097  | 1  | 116302592 | 0.36 | 9.09E-05 | T | 0.16 | N | <i>CASQ2</i>   |
| rs9872146  | 3  | 192850845 | 0.47 | 9.11E-05 | T | 0.22 | N |                |
| rs11265269 | 1  | 159728127 | 0.43 | 9.26E-05 | C | 0.27 | Y |                |
| rs5993954  | 22 | 20282886  | 0.49 | 9.44E-05 | T | 0.27 | Y |                |
| rs997662   | 1  | 245276793 | 0.43 | 9.45E-05 | T | 0.20 | N | <i>EFCAB2</i>  |
| rs11863515 | 16 | 51981775  | 3.33 | 9.52E-05 | A | 0.26 | N |                |
| rs16931937 | 12 | 27548191  | 0.38 | 9.83E-05 | C | 0.17 | N | <i>ARNTL2</i>  |
| rs12555611 | 9  | 34403424  | 0.32 | 9.92E-05 | T | 0.10 | N | <i>C9orf25</i> |
| rs11199832 | 10 | 122970549 | 0.35 | 9.92E-05 | A | 0.10 | N |                |
| rs11677534 | 2  | 219007060 | 2.14 | 9.93E-05 | C | 0.31 | Y |                |

---

|             |                                             |
|-------------|---------------------------------------------|
| <b>AA</b>   | African descent                             |
| <b>NE</b>   | Neuropathy                                  |
| <b>SNP</b>  | Single Nucleotide Polymorphism              |
| <b>CHR</b>  | Chromosome                                  |
| <b>BP</b>   | Chromosome location in base pairs           |
| <b>OR</b>   | Odds ratio from the regression              |
| <b>P</b>    | P value from the regression                 |
| <b>MAF</b>  | Minor Allele Frequency in tested population |
| <b>LD</b>   | Linkage Disequilibrium                      |
| <b>Gene</b> | Symbol of the gene where the SNP locates    |
